# Supplementary material for: Stereoselective cyclopropanation of serine- and threonine-derived oxazines to access new morpholine-based scaffolds
Source: Royal Society of Chemistry journal article supplement (doi:10.1039/b808895k), 2008-01-01
Supplement: b808895k.pdf [file b808895k.pdf]

# Stereoselective cyclopropanation of serine- and threonine-derived oxazines to access new morpholine-based scaffolds†

Filippo Sladojevich,<sup>a</sup> Andrea Trabocchi\*<sup>a</sup> and Antonio Guarna<sup>a</sup>

*Department of Organic Chemistry “Ugo Schiff”, University of Florence, Polo Scientifico e Tecnologico, Via della Lastruccia 13, I-50019 Sesto Fiorentino (FI), Italy. Fax: +39 055 4573531; Tel: +39 055 4573507; E-mail: andrea.trabocchi@unifi.it*

## ELECTRONIC SUPPLEMENTARY INFORMATION

|      |                                                                                                                                                   |         |
|------|---------------------------------------------------------------------------------------------------------------------------------------------------|---------|
| I.   | <sup>1</sup> H and <sup>13</sup> C NMR spectra of compounds <b>4</b> , <b>5</b> , <b>Cbz-8</b> , <b>10</b> , <b>11</b> , <b>12</b> , <b>13</b>    | S2-S8   |
| II.  | <sup>1</sup> H and <sup>13</sup> C NMR spectra of compounds <b>14a</b> , <b>14b</b> , <b>15a</b> , <b>15b</b> , <b>18</b> , <b>19</b> , <b>20</b> | S9-S15  |
| III. | Molecular modeling methods                                                                                                                        | S16     |
| IV.  | Cartesian coordinates of compound <b>20</b> , axial conformer                                                                                     | S16-S17 |
| V.   | Cartesian coordinates of compound <b>20</b> , equatorial conformer                                                                                | S17-S18 |

Compound 4

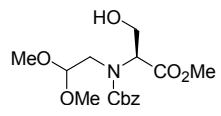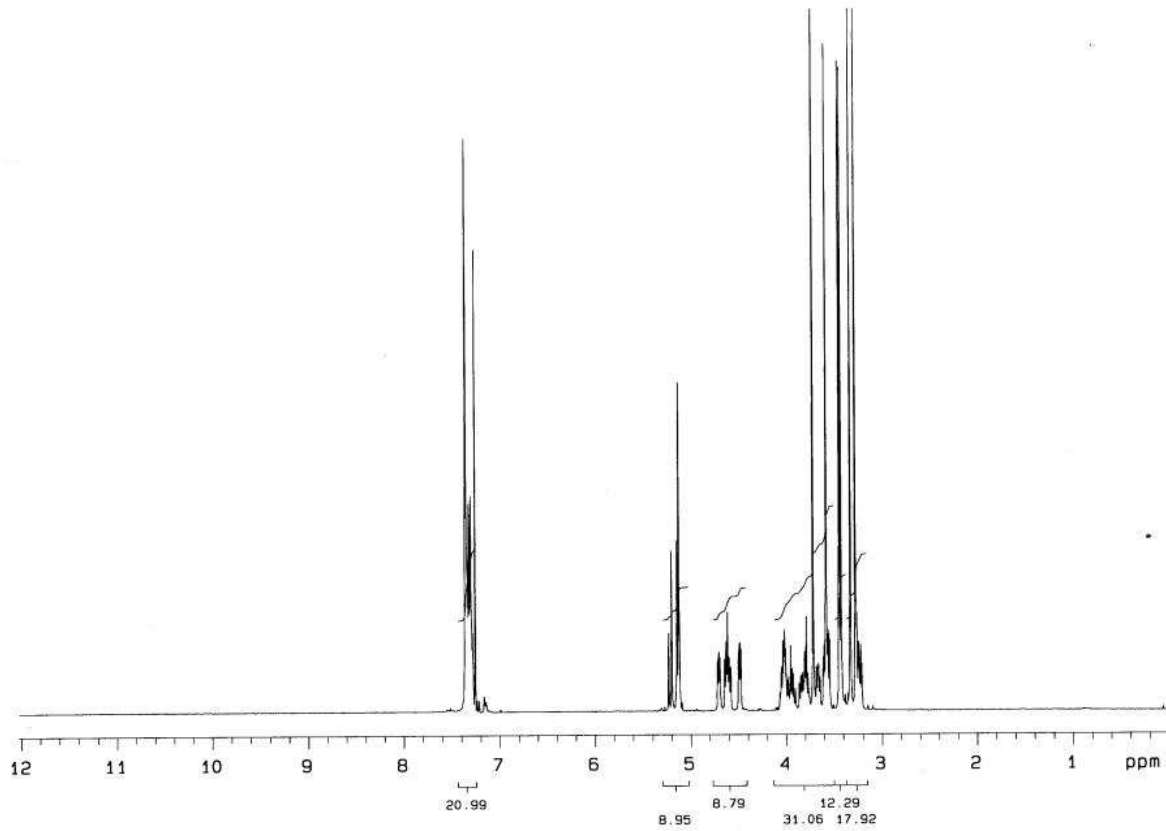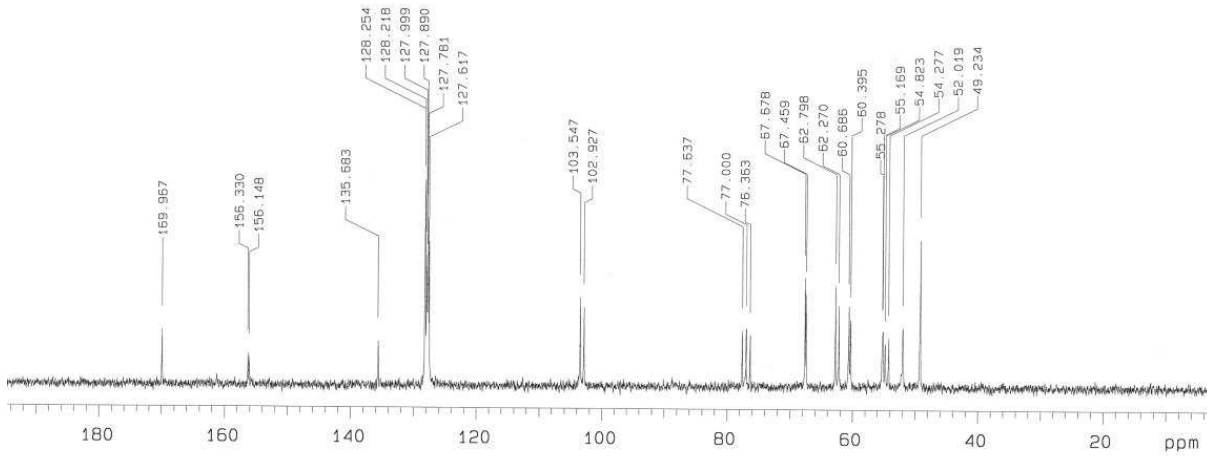

Compound 5

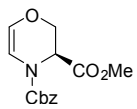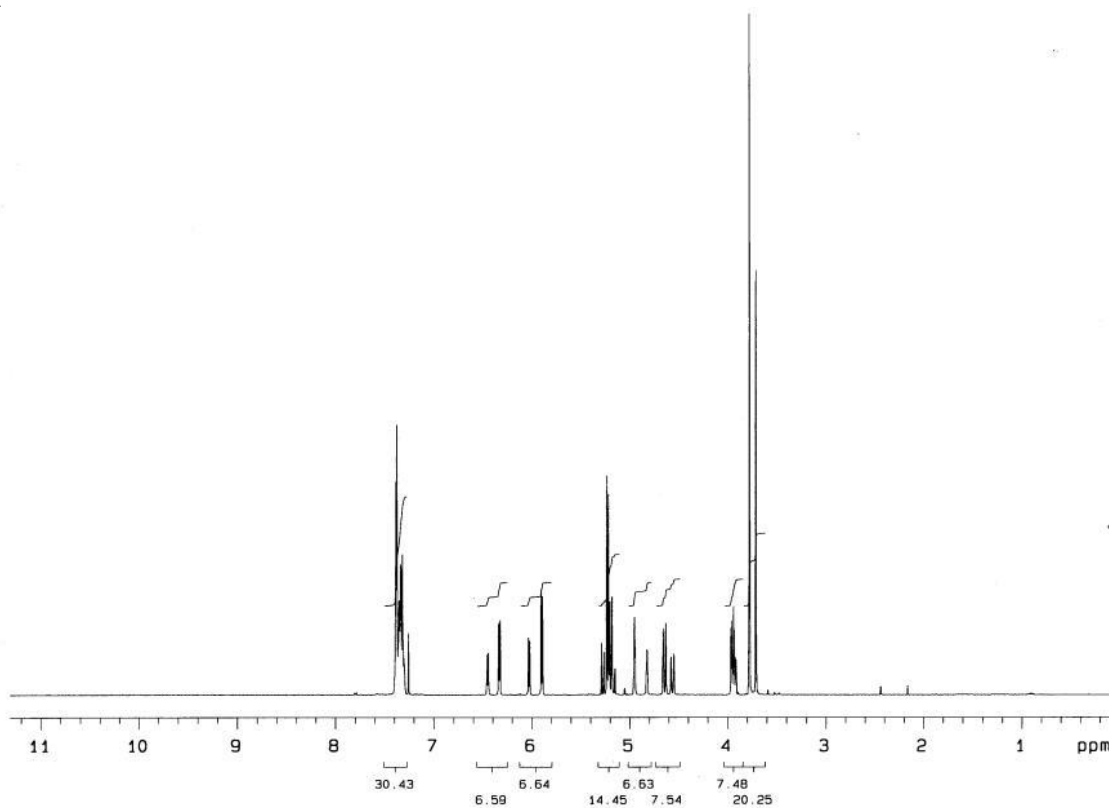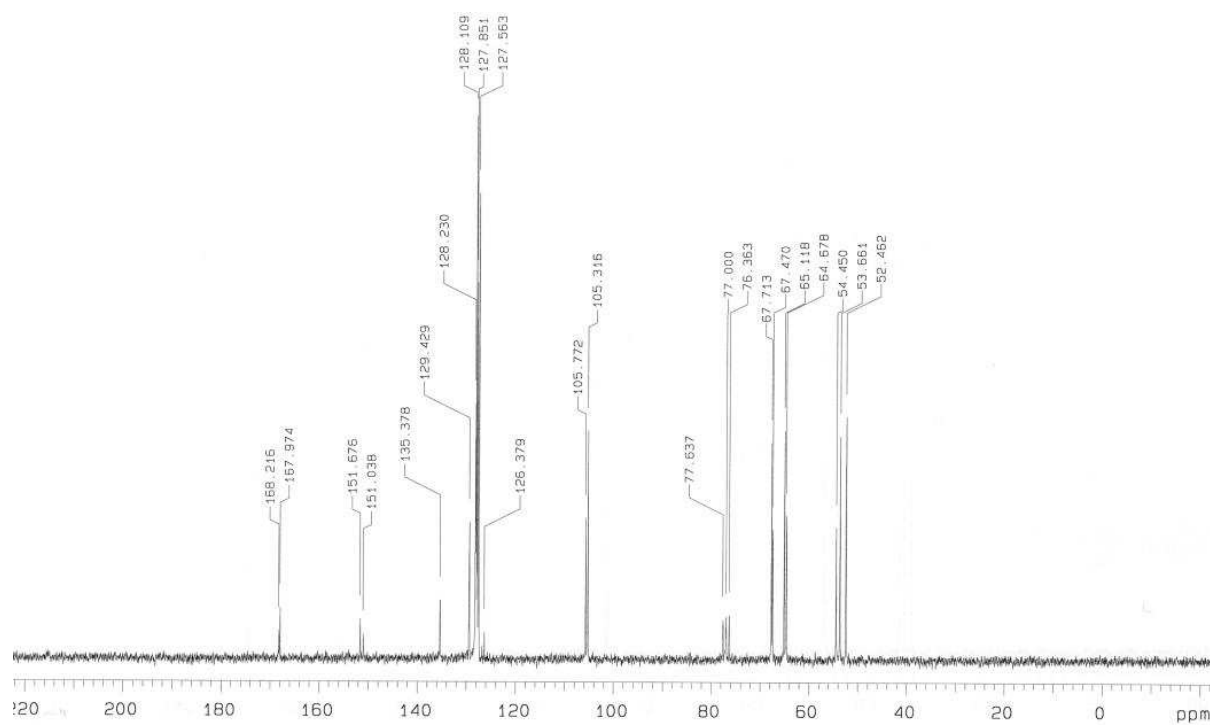

**Cbz-8**

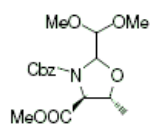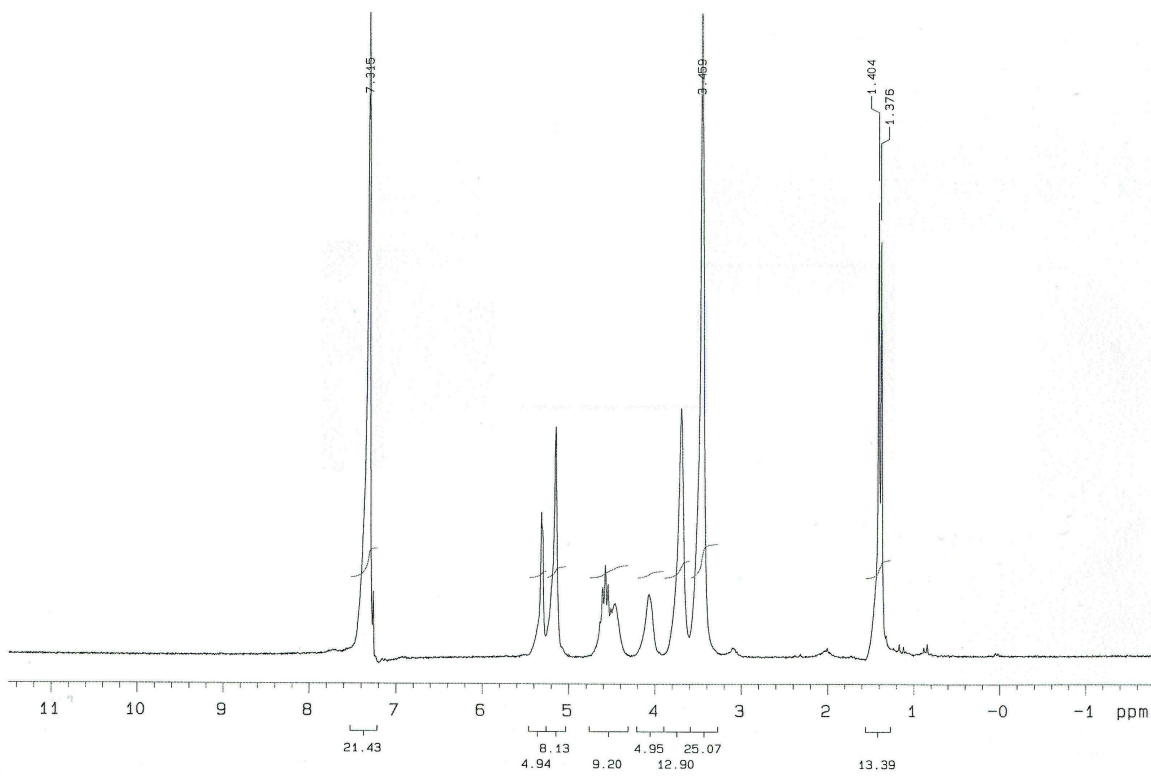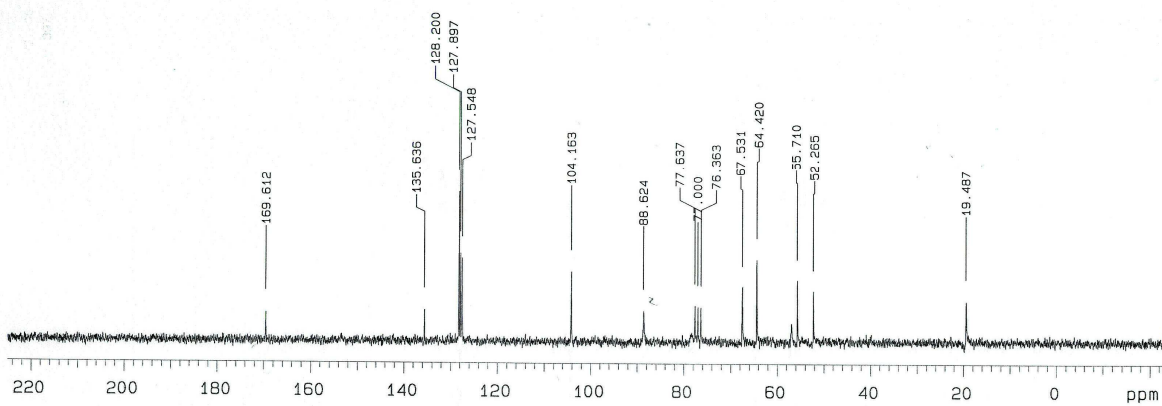

Compound 10

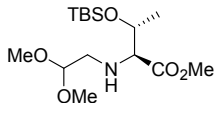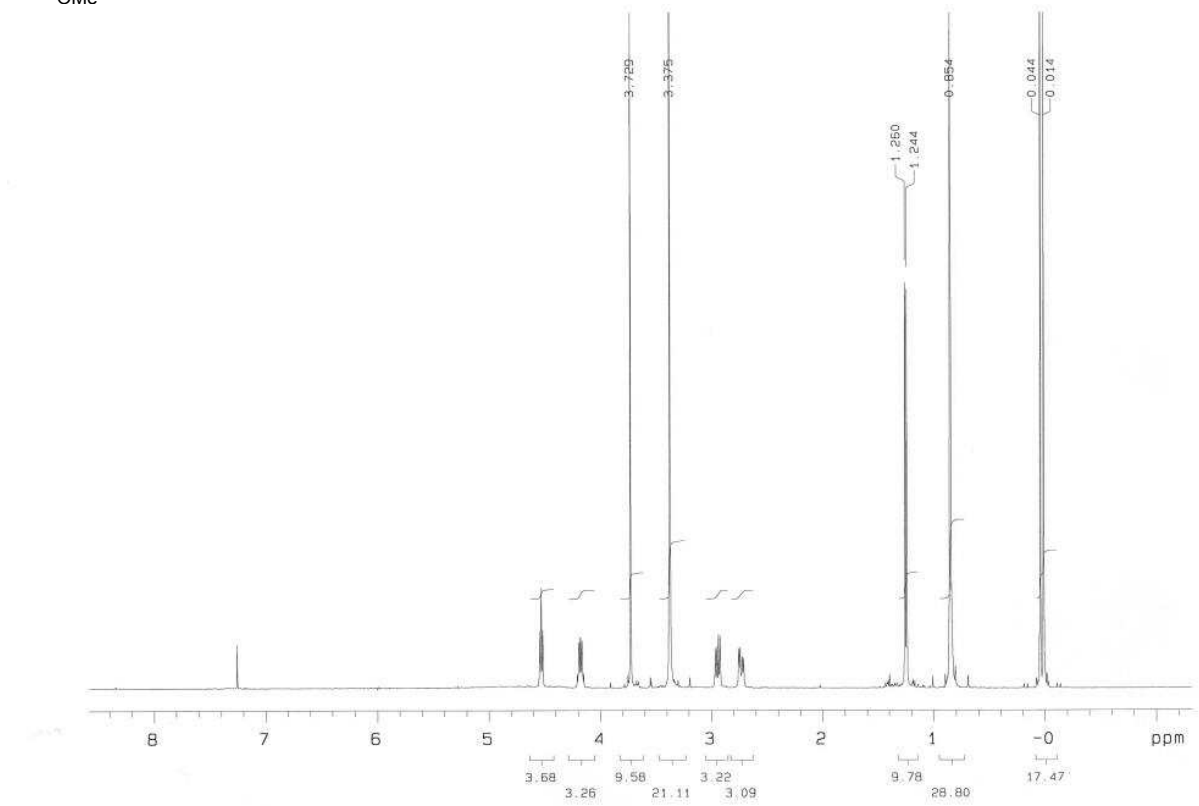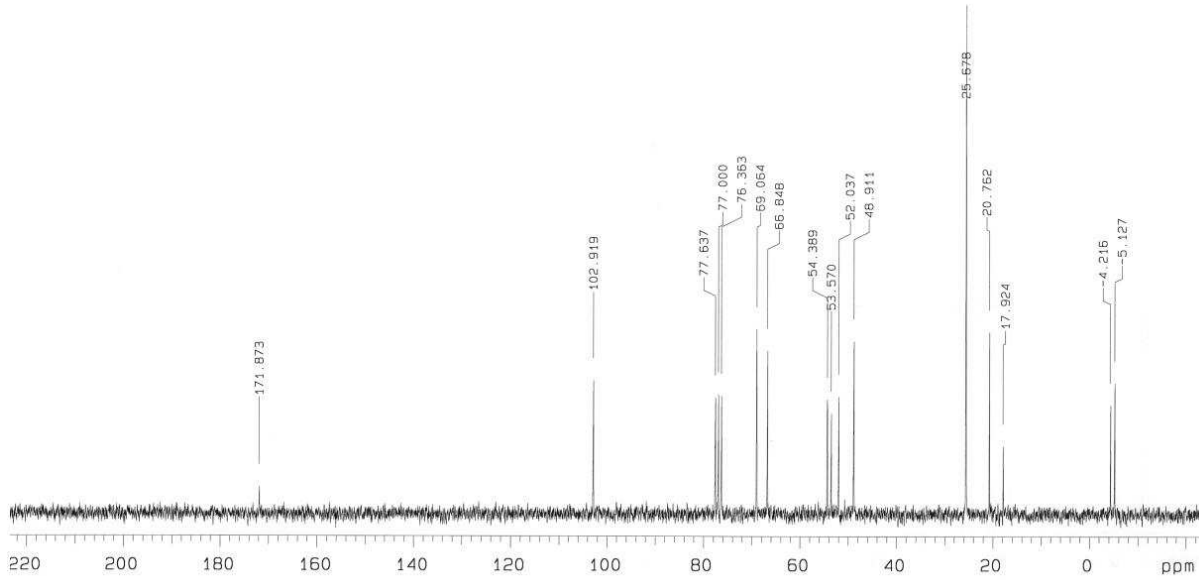

Compound 11

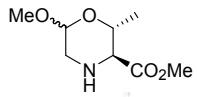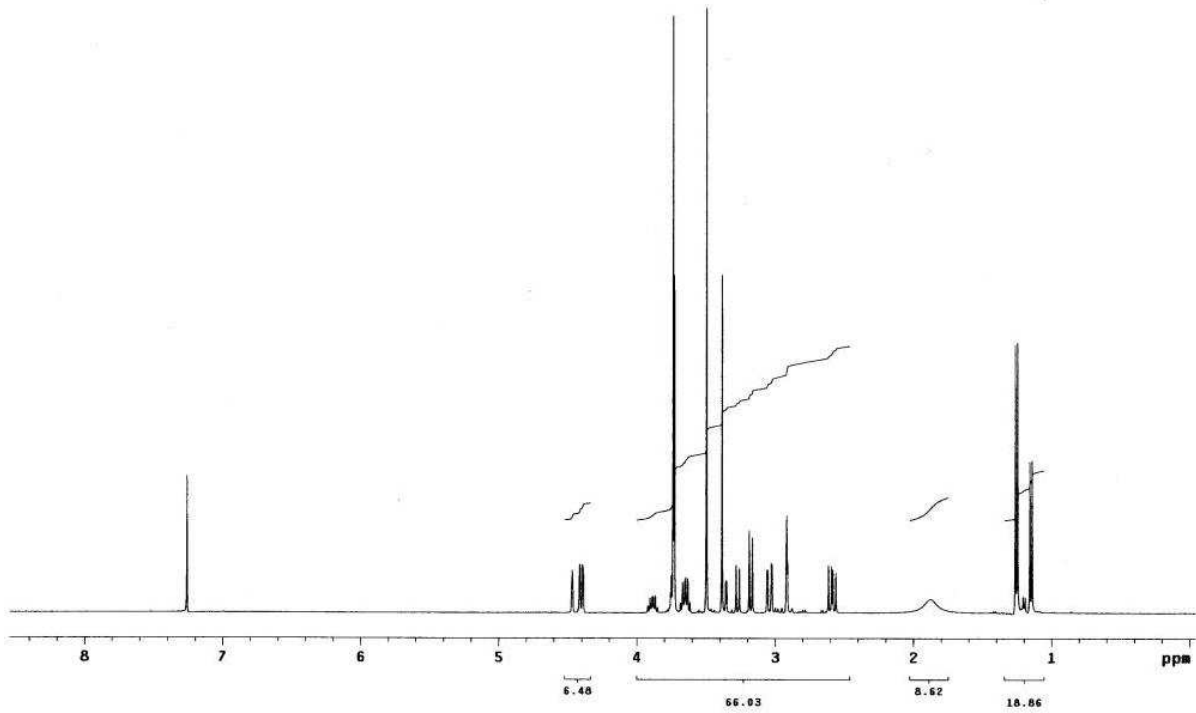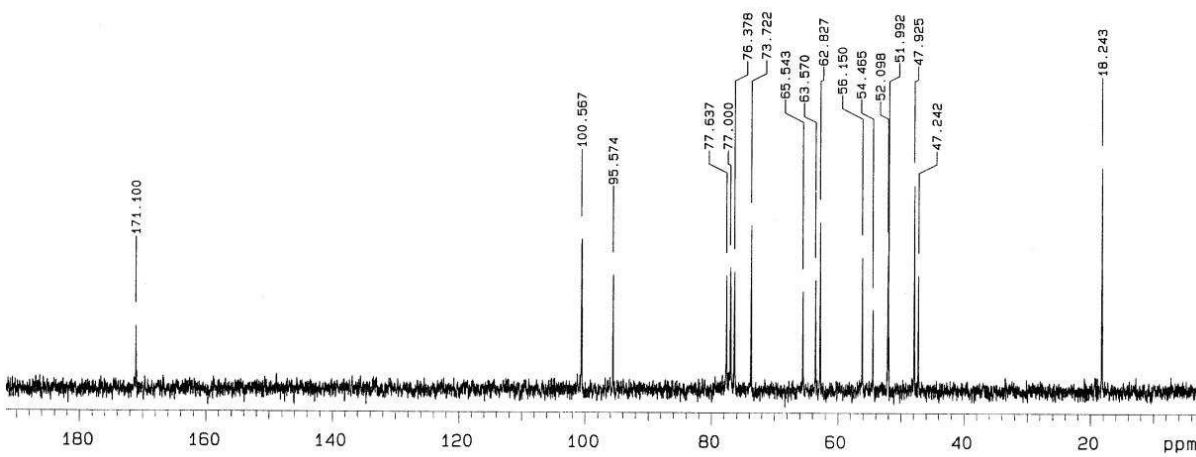

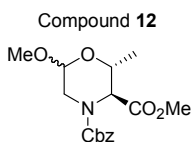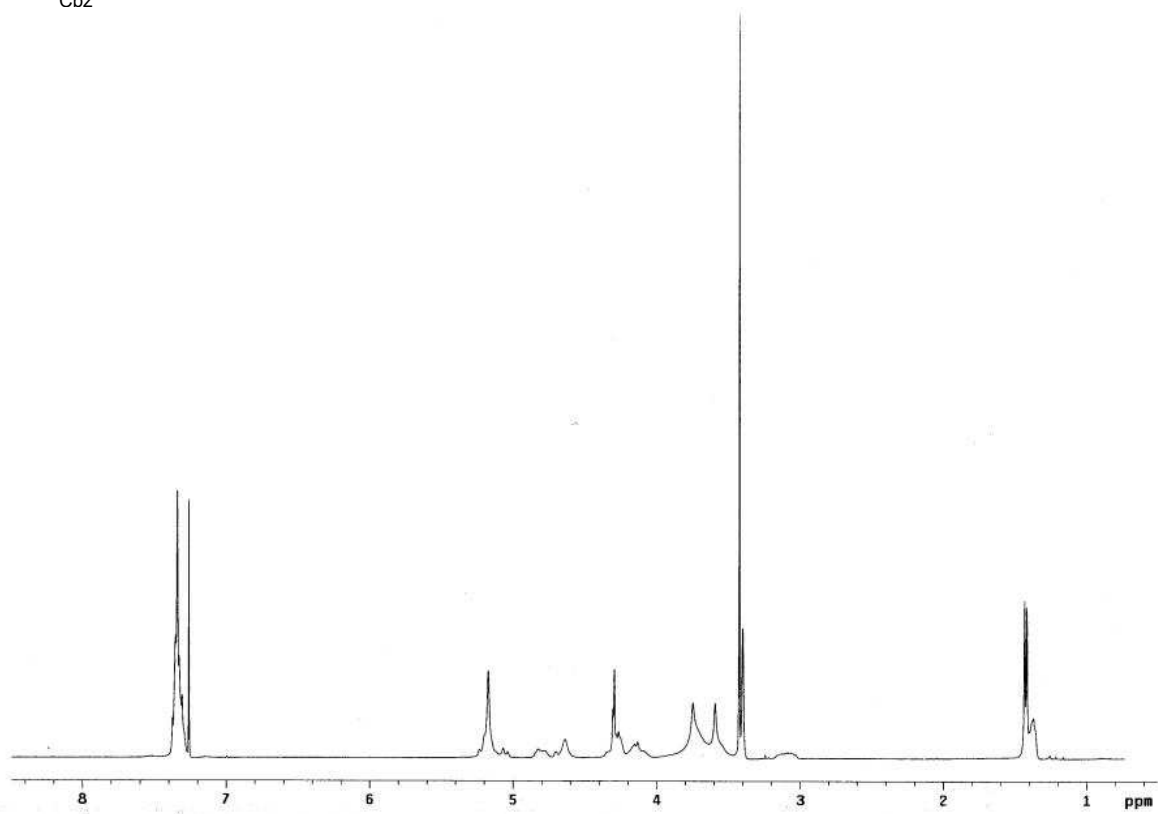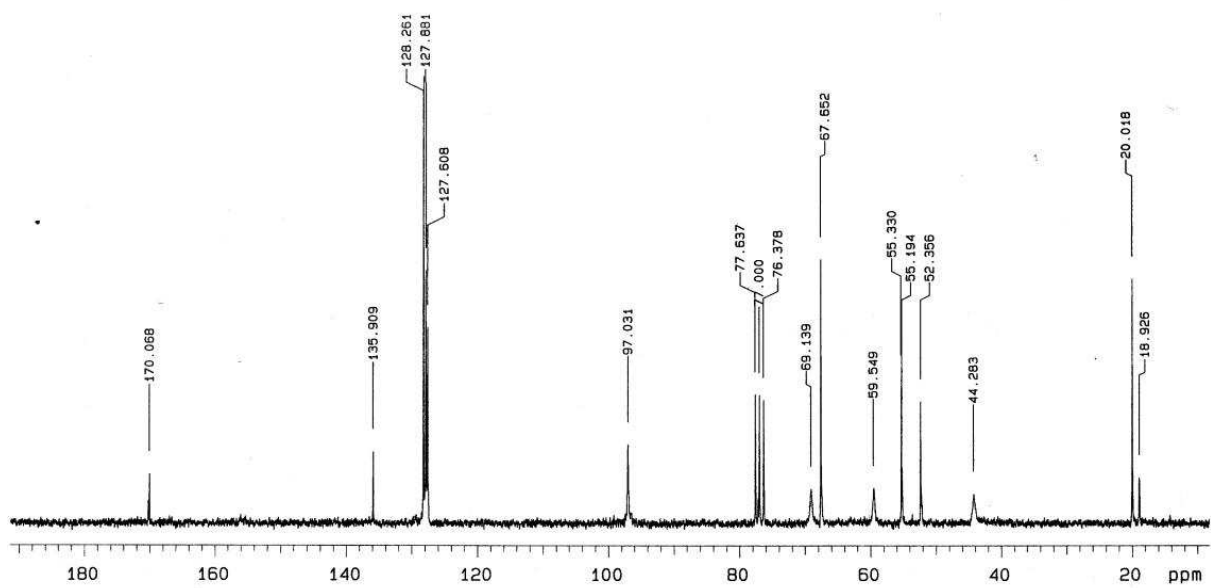

Compound 13

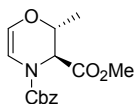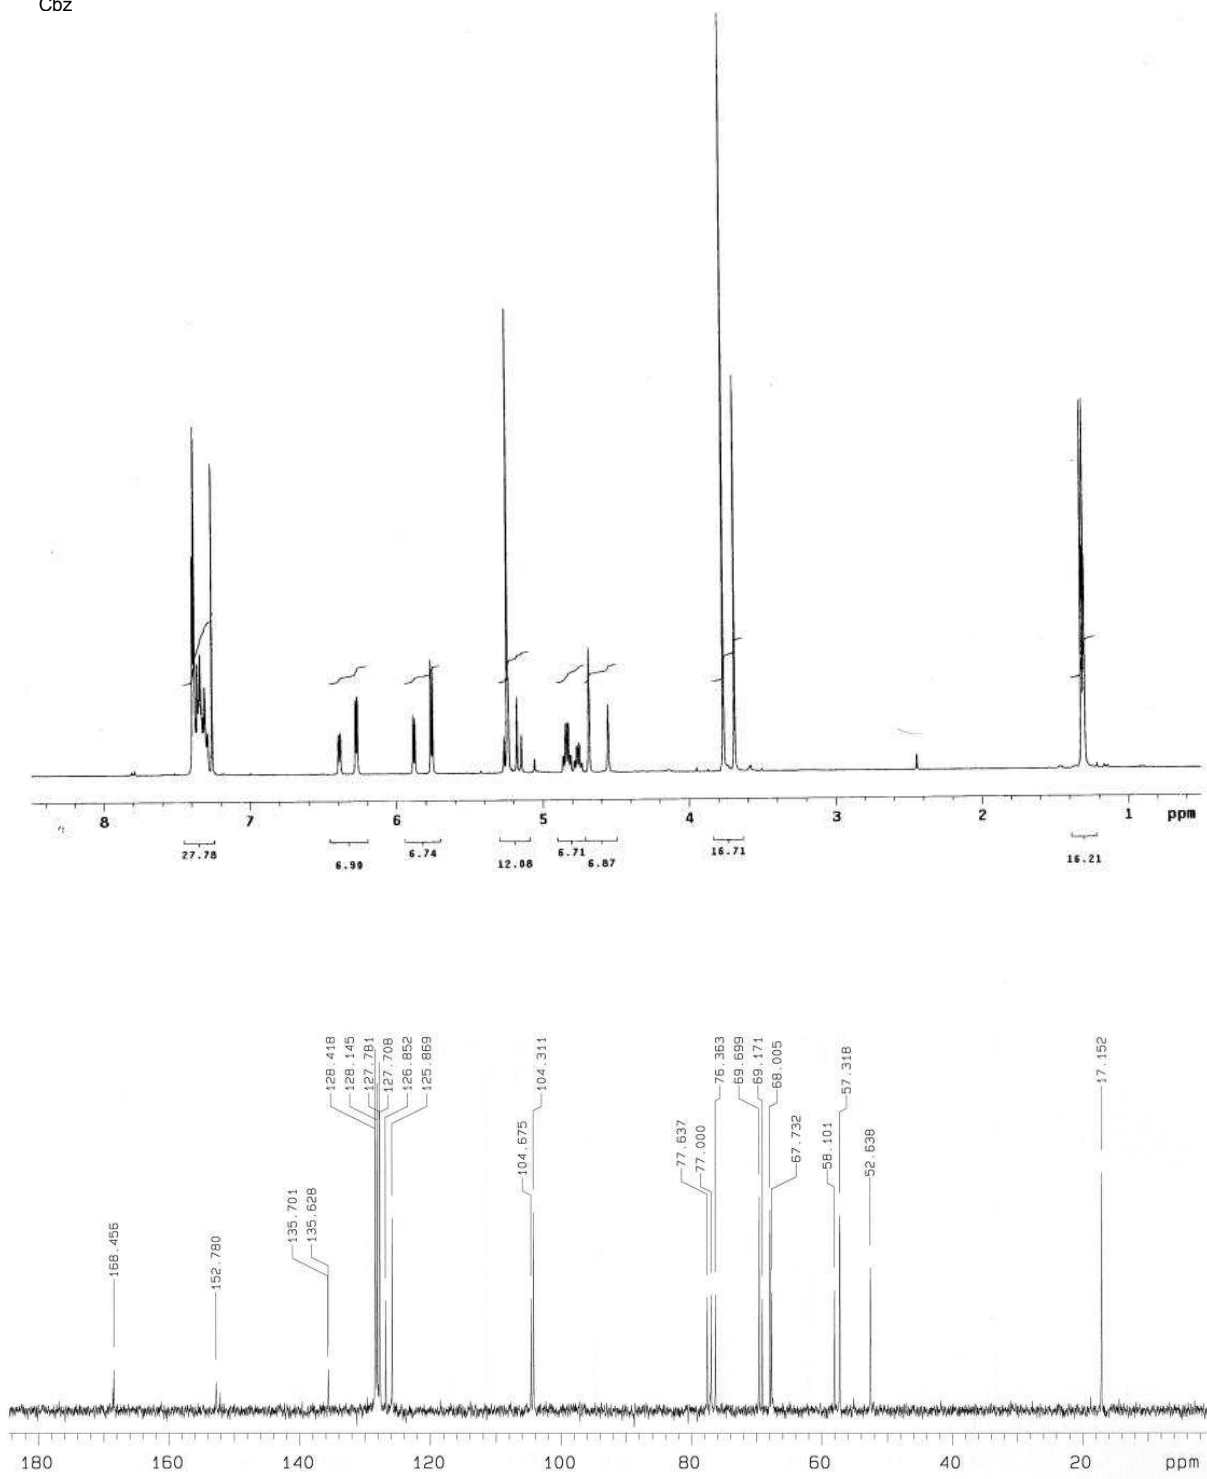



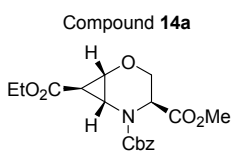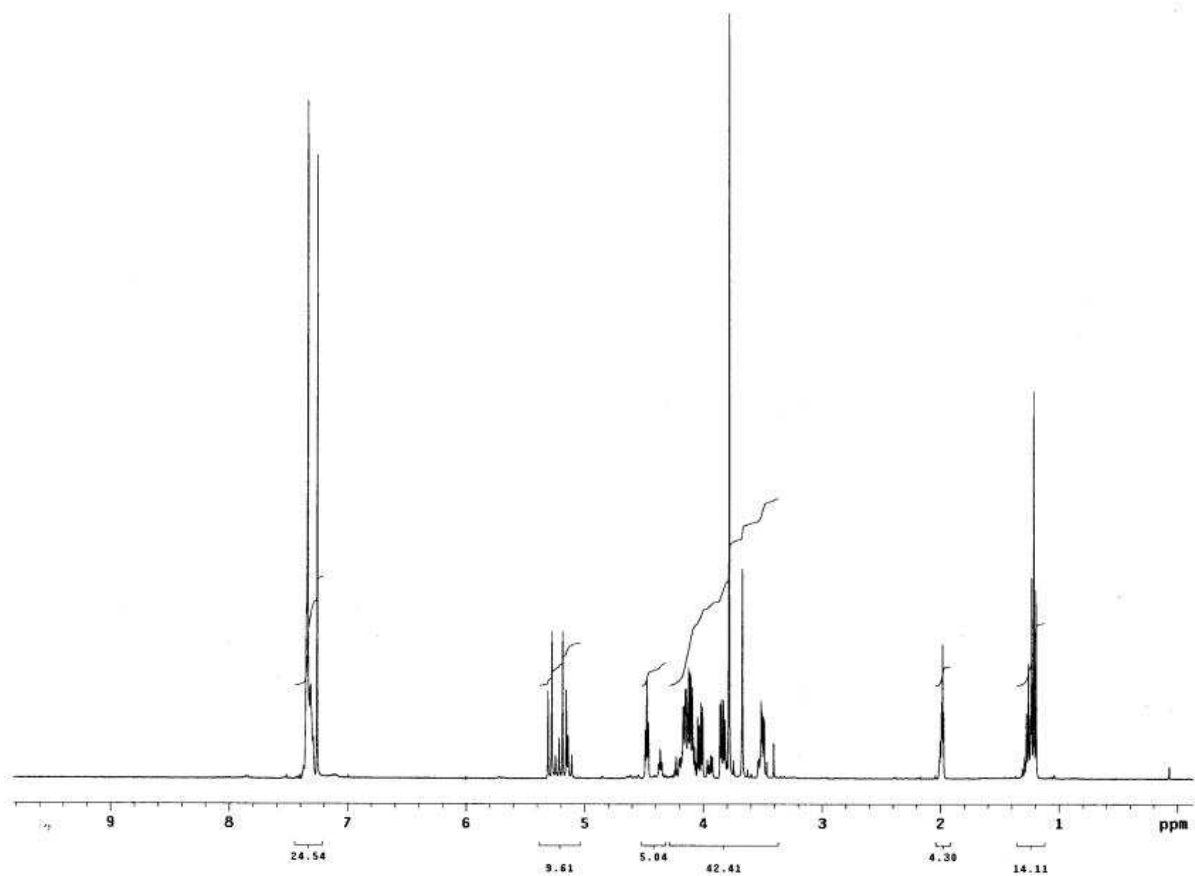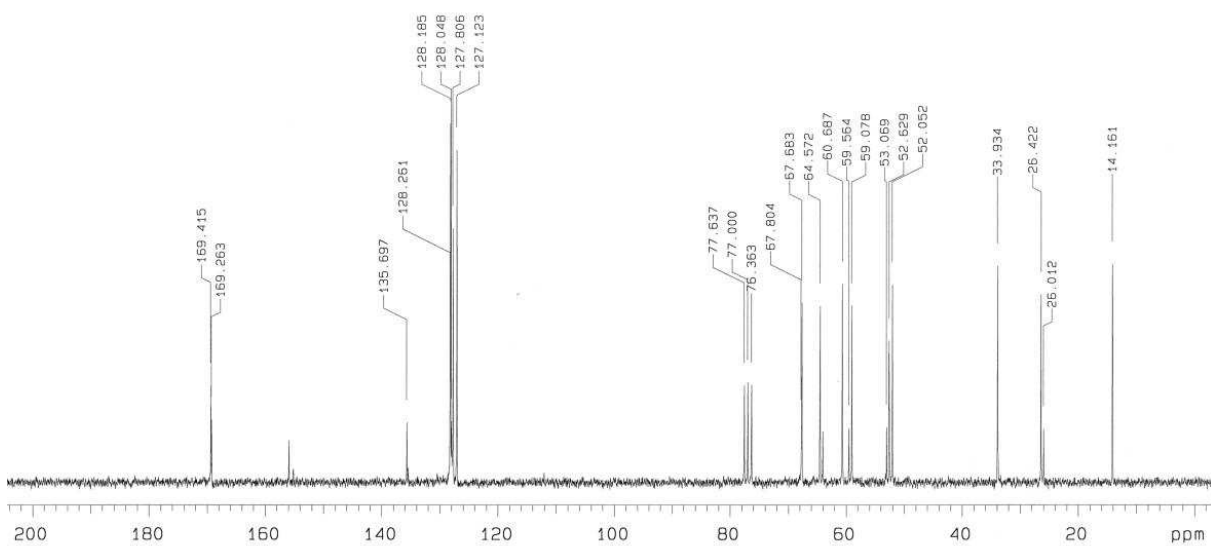

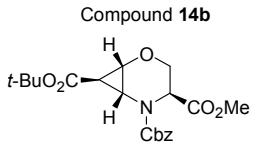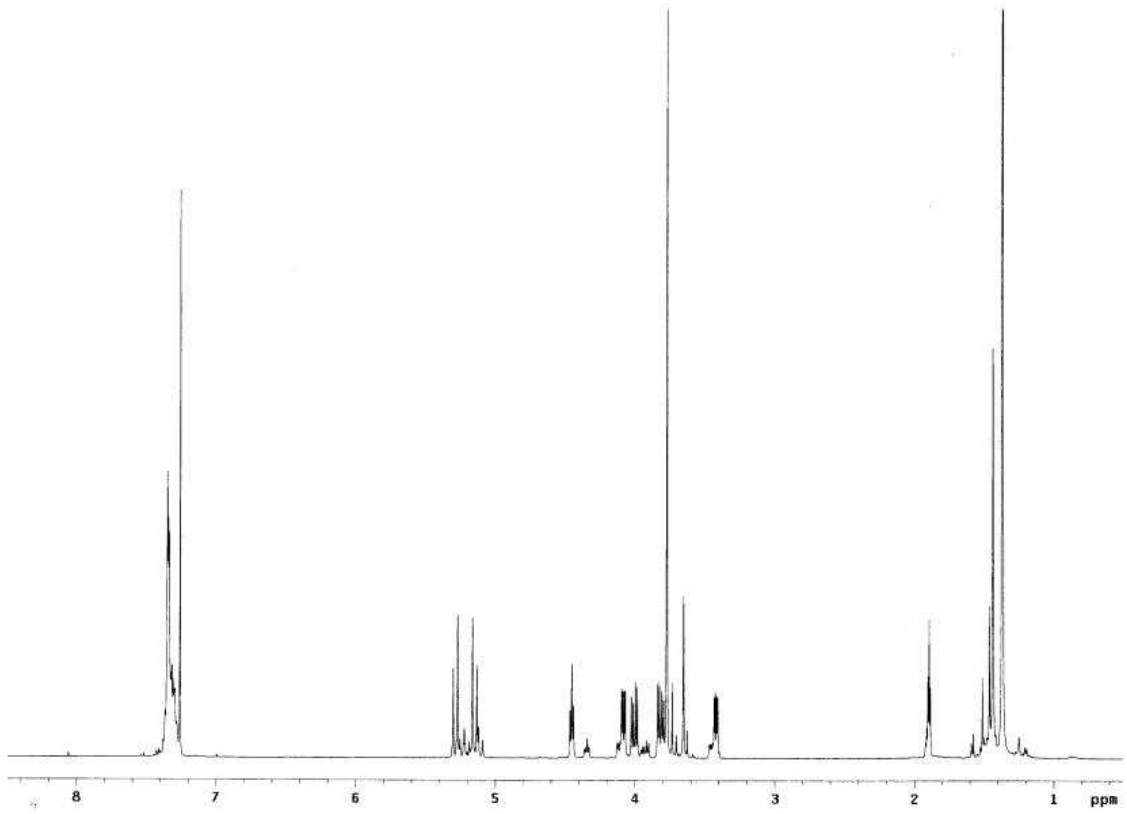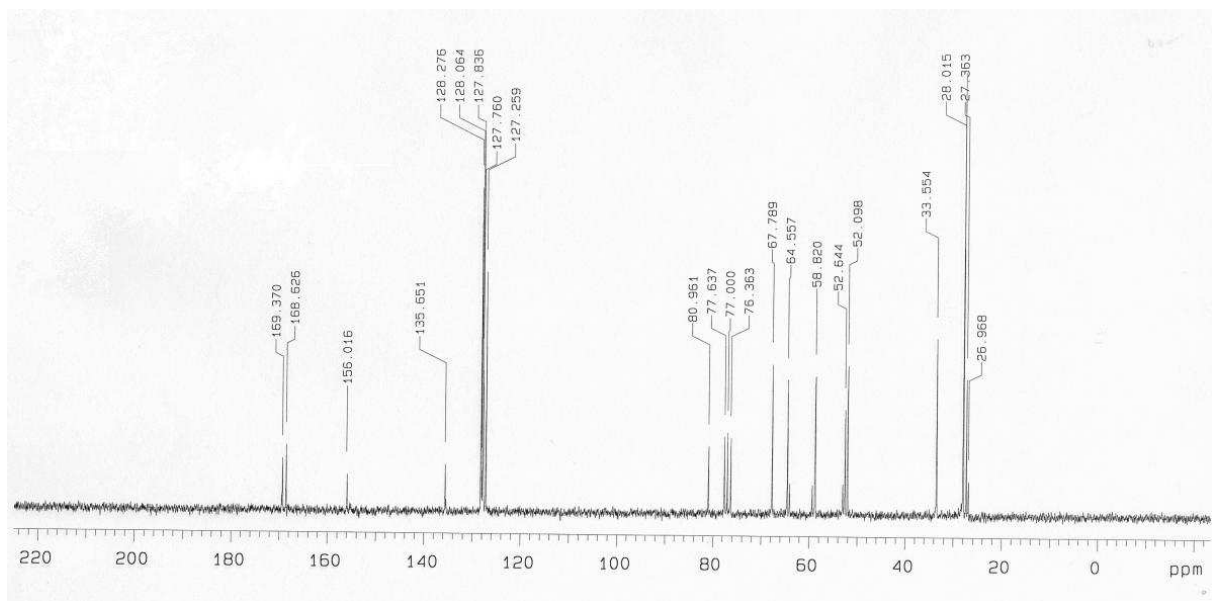

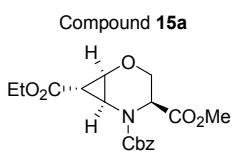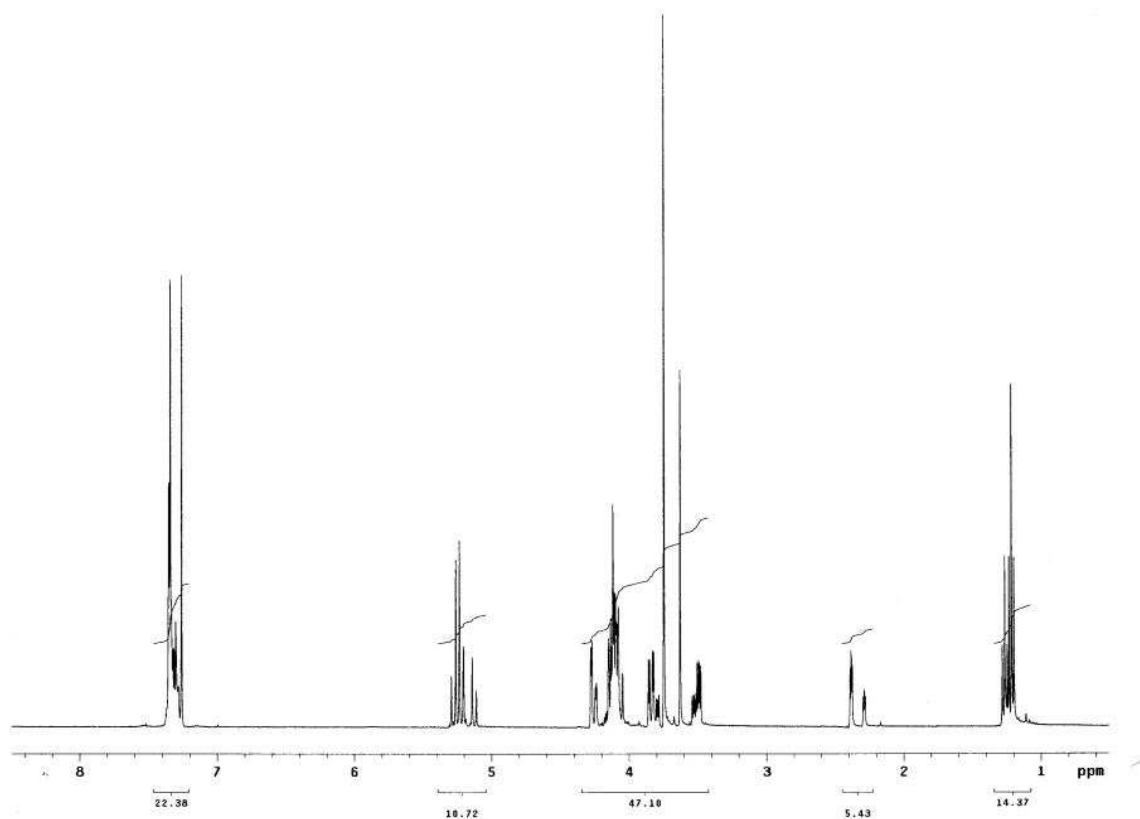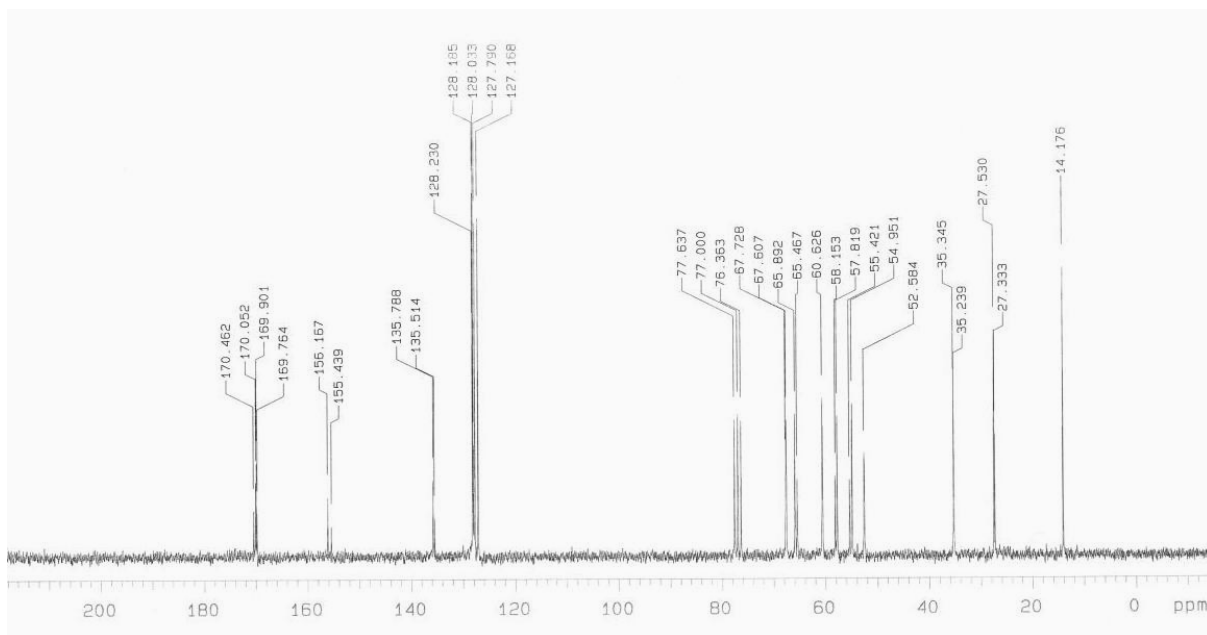

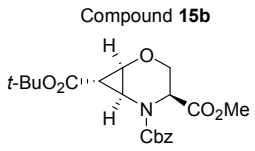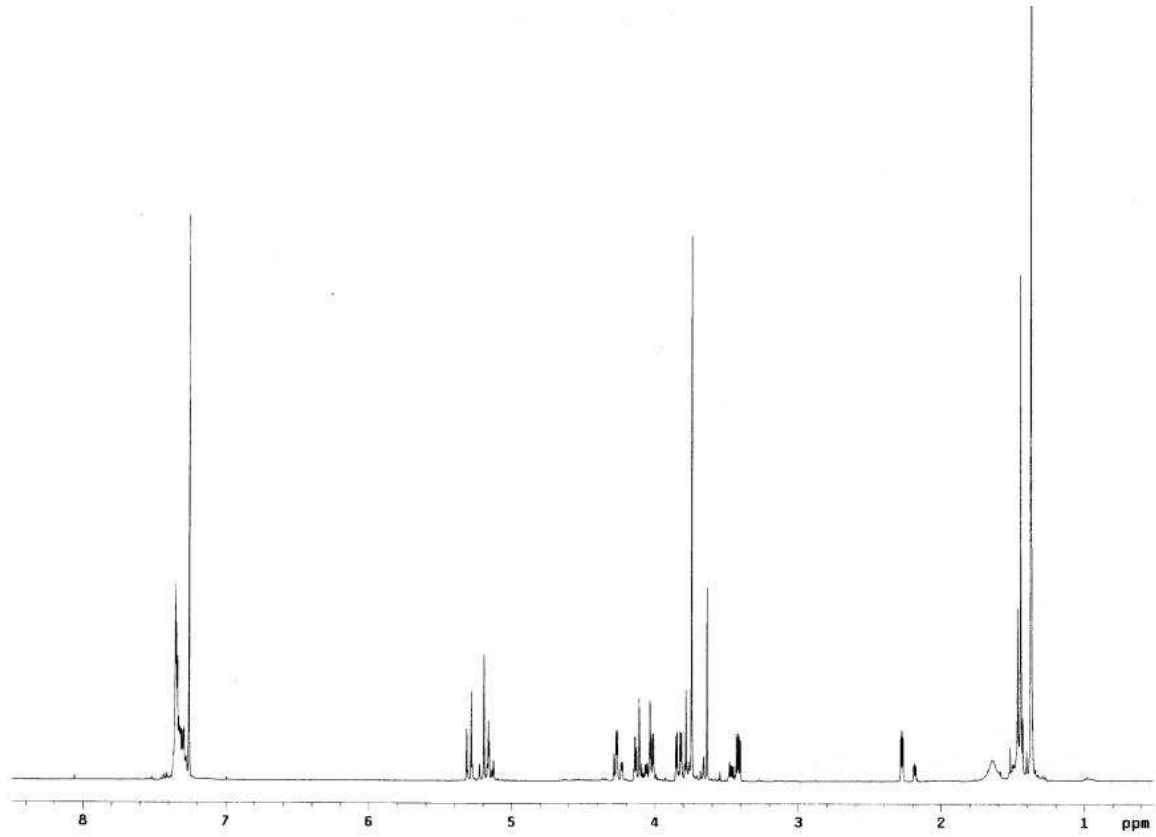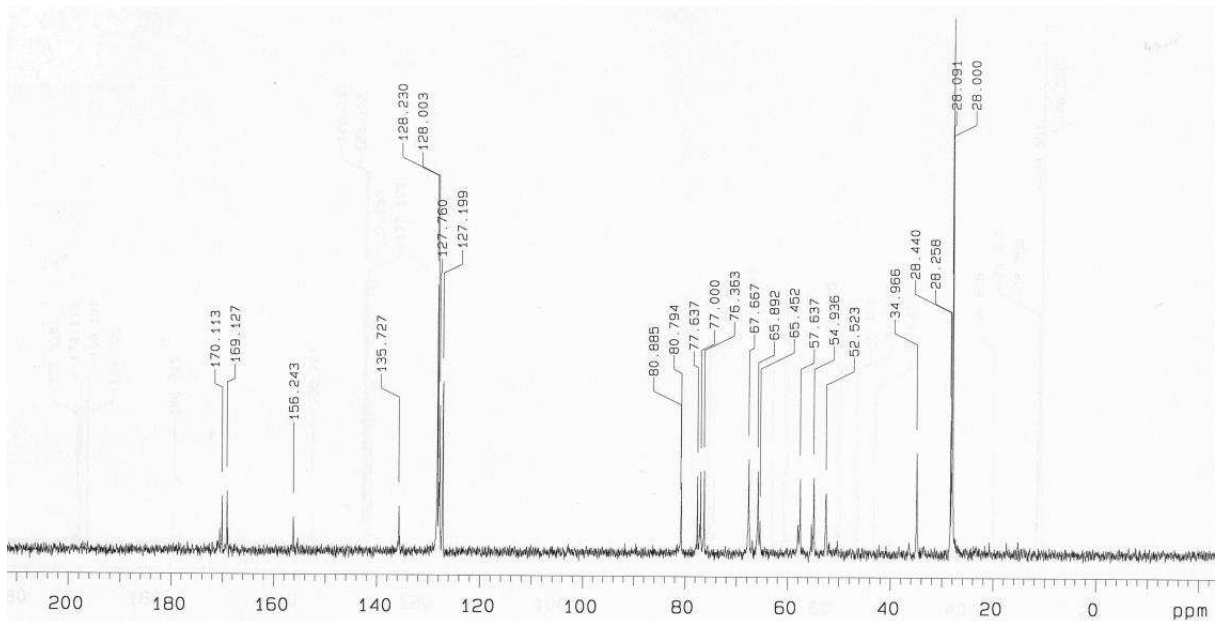

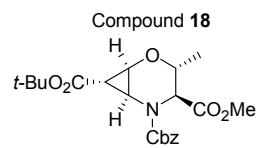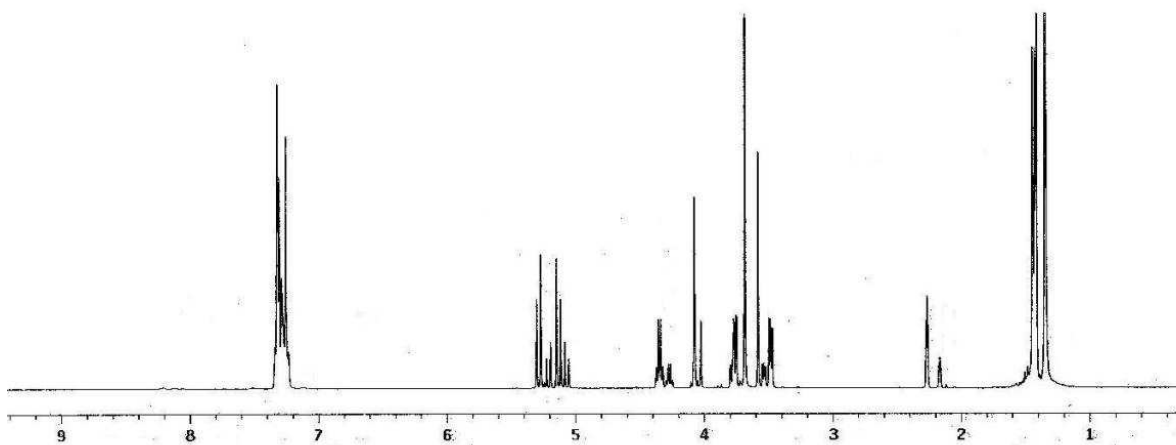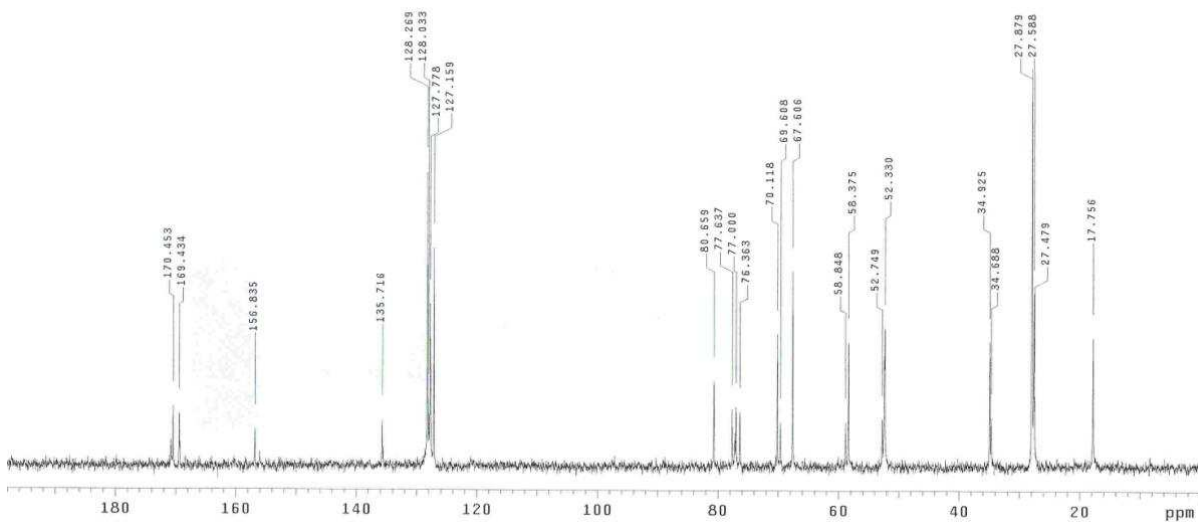

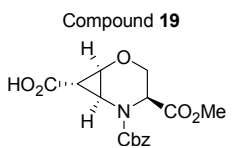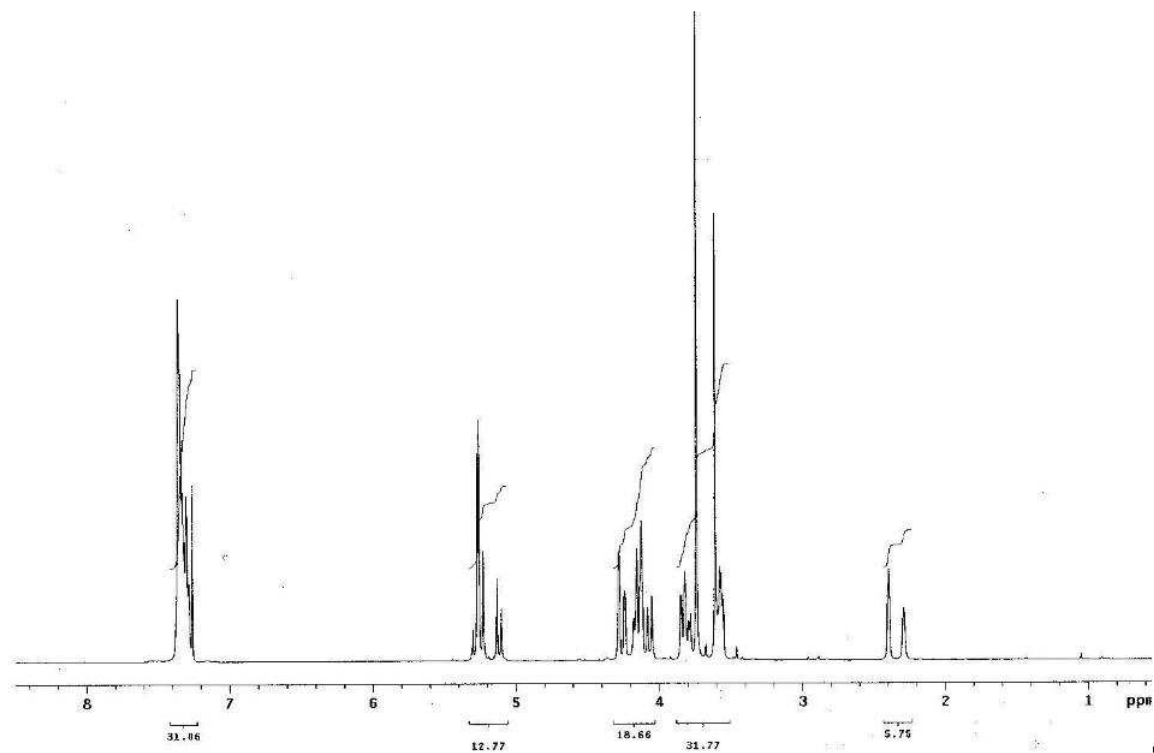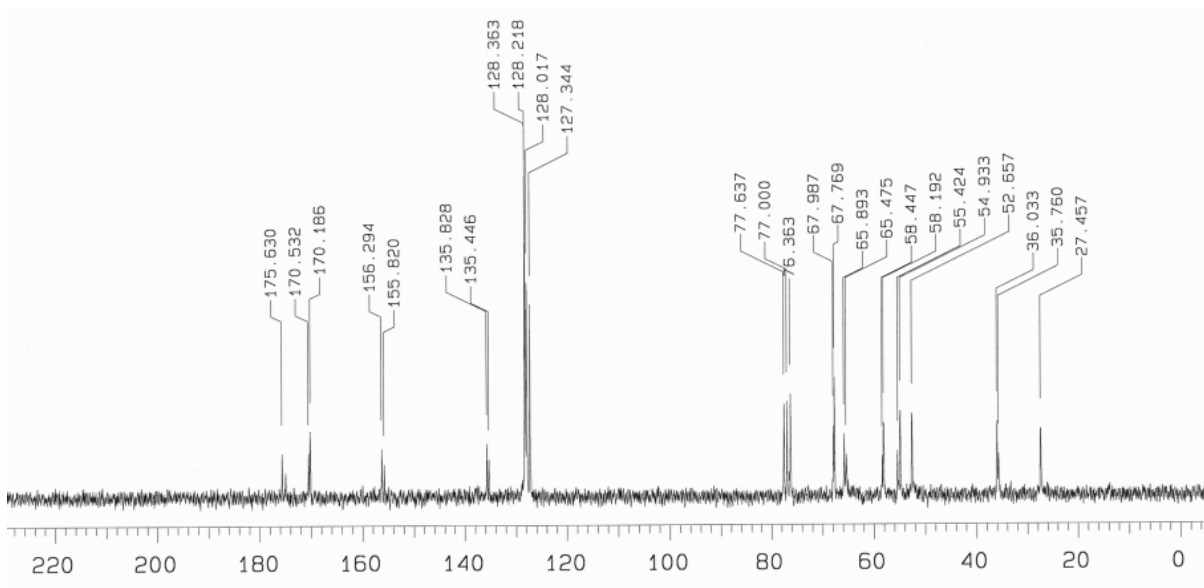

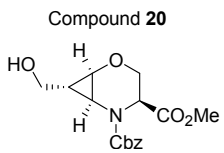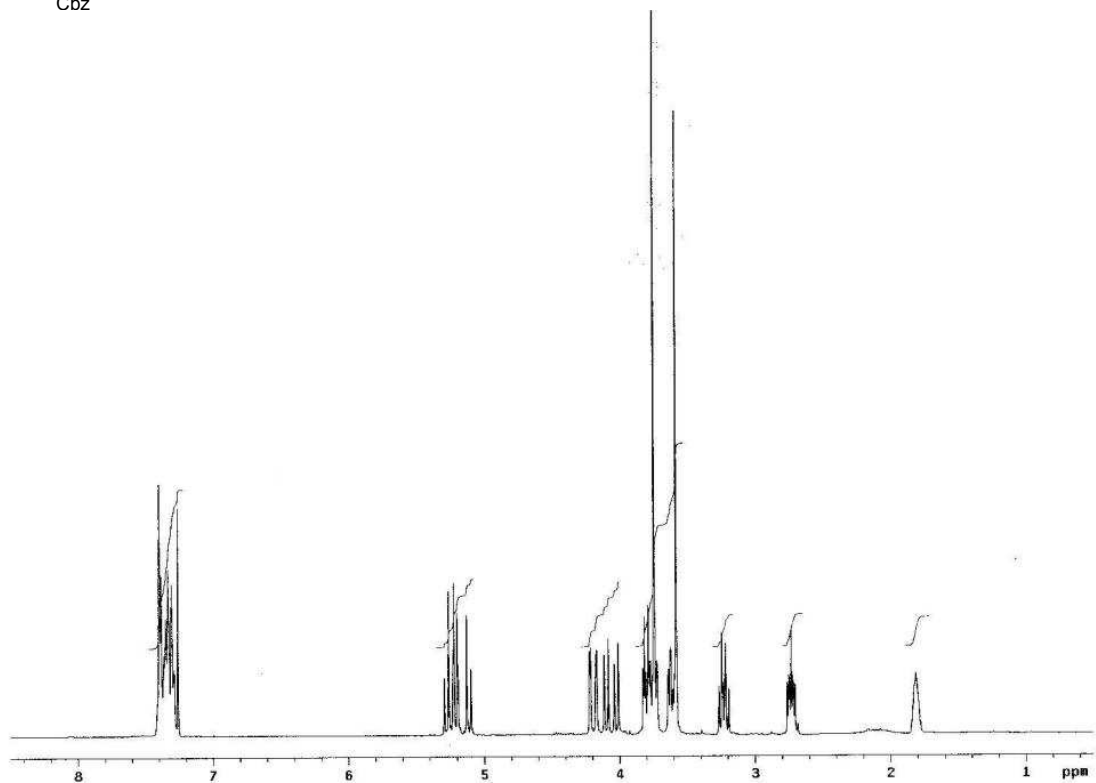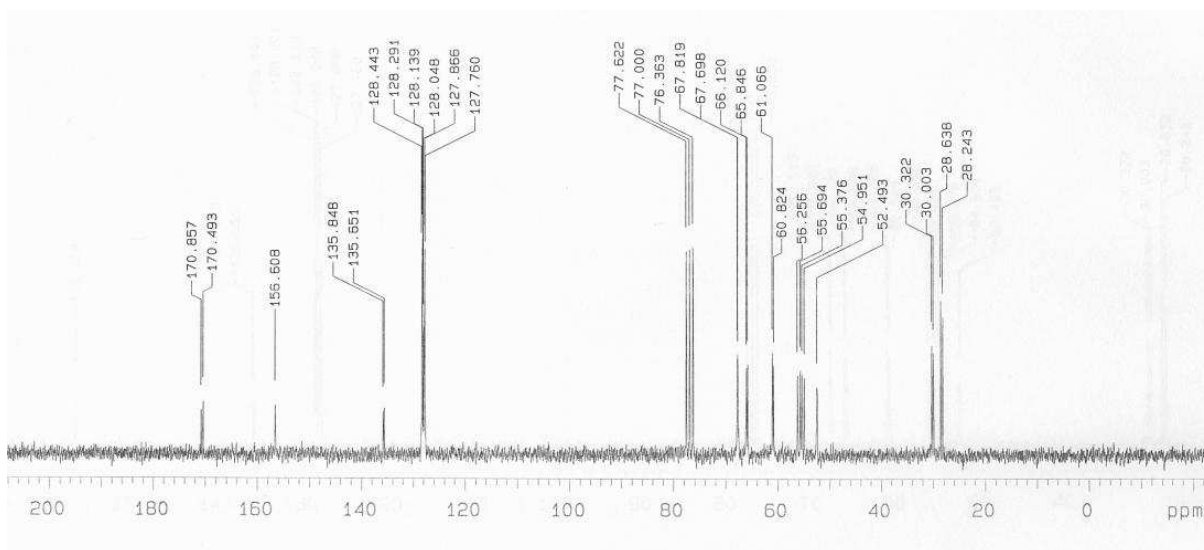

### Molecular Modeling Methods

Calculations were performed using SPARTAN Version 5.1<sup>1</sup> running on a SGI IRIX 6.5 workstation. Conformational searches of **20** were carried out using Monte Carlo method within MMFF94 force field,<sup>2</sup> and the AM1 semiempirical method<sup>3</sup> was used to optimize the global minimum conformer. The geometry of the most abundant minimum energy conformer was successively subjected to *ab initio* single point energy calculation at the 3-21G\*/ HF level<sup>4</sup> of quantum chemical theory.

1. Wavefunction, Inc., Irvine, CA.
2. (a) Halgren, T. A. *J. Comput. Chem.* **1996**, *17*, 490-519. (b) Halgren, T. A. *J. Comput. Chem.* **1996**, *17*, 520-552. (c) Halgren, T. A. *J. Comput. Chem.* **1996**, *17*, 553-586. (d) Halgren, T. A.; Nachbar, R. B. *J. Comput. Chem.* **1996**, *17*, 587-615. (e) Halgren, T. A. *J. Comput. Chem.* **1996**, *17*, 616-641.
3. Dewar, M. J. S.; Zoebisch, E. G.; Healy, E. F.; Stewart, J. J. P. *J. Am. Chem. Soc.* **1985**, *107*, 3902 – 3909.

Hehre, W. J.; Radam, L.; Schleyer, P. R.; Pople, J. A. *Ab initio molecular orbital theory*; Wiley: New York, 1986.

Axial conformer: E(HF) = -1381.7068749 a.u. (-867034.881068499 kcal/mol)

Equatorial conformer: E(HF) = -1381.6956637 a.u. (-867027.845928387 kcal/mol)

$\Delta E$  (ax-eq) = -7.03 kcal/mol

### Cartesian Coordinates for axial conformer of **20**

| ATOM  | X      | Y      | Z      |
|-------|--------|--------|--------|
| O(1)  | 2.483  | 0.904  | -1.355 |
| C(2)  | 0.026  | 0.396  | -1.028 |
| C(3)  | 1.603  | 0.195  | 0.859  |
| N(4)  | 0.284  | -0.027 | 0.310  |
| C(5)  | 2.716  | 0.069  | -0.218 |
| C(6)  | 1.198  | 0.795  | -1.906 |
| C(9)  | 1.773  | 1.537  | 1.570  |
| O(10) | 2.910  | 1.559  | 2.330  |
| C(11) | 3.175  | 2.767  | 3.048  |
| O(15) | 1.056  | 2.536  | 1.553  |
| C(16) | -0.801 | -0.313 | 1.139  |
| O(17) | -0.456 | -0.498 | 2.460  |
| C(18) | -1.499 | -0.955 | 3.341  |
| O(21) | -1.981 | -0.453 | 0.784  |
| C(24) | 0.192  | 1.848  | -1.475 |
| C(26) | -0.753 | 2.348  | -2.499 |
| O(27) | -1.207 | 1.721  | -3.460 |
| O(28) | -1.097 | 3.647  | -2.286 |
| C(29) | -2.035 | 4.319  | -3.166 |
| C(30) | 2.909  | -1.375 | -0.633 |
| C(34) | -1.569 | -2.445 | 3.373  |
| C(35) | -1.755 | -5.232 | 3.468  |
| C(36) | -2.339 | -3.131 | 2.426  |



|       |        |        |        |
|-------|--------|--------|--------|
| C(37) | -0.891 | -3.161 | 4.364  |
| C(38) | -0.986 | -4.551 | 4.411  |
| C(39) | -2.430 | -4.521 | 2.475  |
| C(45) | -3.388 | 3.628  | -3.135 |
| C(49) | -1.480 | 4.400  | -4.578 |
| C(53) | -2.137 | 5.716  | -2.554 |
| H(23) | -0.818 | -0.178 | -1.478 |
| H(7)  | 1.786  | -0.603 | 1.645  |
| H(8)  | 3.673  | 0.489  | 0.214  |
| H(22) | 1.252  | 0.469  | -2.963 |
| H(12) | 2.348  | 2.965  | 3.772  |
| H(13) | 3.275  | 3.619  | 2.335  |
| H(14) | 4.138  | 2.553  | 3.573  |
| H(19) | -2.484 | -0.511 | 3.037  |
| H(20) | -1.169 | -0.537 | 4.332  |
| H(25) | 0.499  | 2.617  | -0.732 |
| H(31) | 3.737  | -1.439 | -1.381 |
| H(32) | 1.980  | -1.784 | -1.099 |
| H(33) | 3.174  | -1.995 | 0.256  |
| H(44) | -1.830 | -6.329 | 3.505  |
| H(40) | -2.863 | -2.561 | 1.640  |
| H(41) | -0.282 | -2.626 | 5.108  |
| H(42) | -0.452 | -5.111 | 5.193  |
| H(43) | -3.037 | -5.056 | 1.729  |
| H(46) | -3.330 | 2.631  | -3.635 |
| H(47) | -4.138 | 4.259  | -3.666 |
| H(48) | -3.718 | 3.482  | -2.078 |
| H(50) | -1.454 | 3.387  | -5.047 |
| H(51) | -0.445 | 4.816  | -4.561 |
| H(52) | -2.129 | 5.067  | -5.193 |
| H(54) | -2.843 | 6.329  | -3.160 |
| H(55) | -1.134 | 6.205  | -2.545 |
| H(56) | -2.511 | 5.648  | -1.505 |

Cartesian Coordinates for equatorial conformer of **20**

| ATOM  | X      | Y      | Z      |
|-------|--------|--------|--------|
| O(1)  | -1.056 | -0.172 | -2.570 |
| C(2)  | -1.959 | -0.693 | -0.279 |
| C(3)  | 0.486  | -0.401 | -0.613 |
| N(4)  | -0.650 | -0.373 | 0.243  |
| C(5)  | 0.254  | -0.296 | -2.106 |
| C(6)  | -2.035 | -0.899 | -1.824 |
| C(8)  | -1.569 | 0.559  | 3.635  |
| C(12) | -1.763 | 2.037  | 3.686  |
| C(13) | -2.110 | 4.806  | 3.845  |
| C(14) | -0.670 | 2.895  | 3.509  |

C(15) -3.030 2.573 3.937  
C(16) -3.202 3.954 4.018  
C(17) -0.846 4.275 3.589  
O(25) -1.657 0.063 2.286  
C(26) -0.484 0.036 1.563  
O(27) 0.584 0.360 2.105  
C(28) -2.521 -1.982 0.330  
O(29) -3.853 -1.875 0.613  
C(30) -4.479 -3.023 1.190  
O(34) -1.951 -3.050 0.545  
C(35) -3.381 -0.417 -2.335  
C(39) 0.759 -1.603 -1.522  
C(41) 2.179 -1.953 -1.759  
O(42) 2.358 -3.297 -1.874  
C(43) 3.683 -3.854 -2.074  
C(44) 4.274 -3.373 -3.389  
C(48) 4.586 -3.520 -0.899  
C(52) 3.416 -5.358 -2.130  
O(56) 3.131 -1.175 -1.861  
H(23) -2.658 0.152 0.014  
H(24) 1.372 0.103 -0.158  
H(7) 0.903 0.327 -2.755  
H(11) -1.897 -1.996 -2.049  
H(9) -0.586 0.265 4.092  
H(10) -2.415 0.016 4.140  
H(22) -2.247 5.895 3.909  
H(18) 0.324 2.467 3.298  
H(19) -3.893 1.903 4.069  
H(20) -4.199 4.372 4.217  
H(21) 0.015 4.945 3.449  
H(31) -3.986 -3.278 2.158  
H(32) -4.412 -3.886 0.486  
H(33) -5.538 -2.697 1.341  
H(36) -3.498 -0.699 -3.408  
H(37) -3.457 0.693 -2.248  
H(38) -4.193 -0.893 -1.731  
H(40) 0.095 -2.489 -1.475  
H(45) 3.543 -3.529 -4.217  
H(46) 5.203 -3.950 -3.611  
H(47) 4.527 -2.287 -3.330  
H(49) 4.085 -3.793 0.060  
H(50) 4.822 -2.428 -0.884  
H(51) 5.538 -4.095 -0.988  
H(53) 2.935 -5.697 -1.182  
H(54) 4.384 -5.895 -2.266  
H(55) 2.737 -5.596 -2.981
